# Supplementary material for: Malnutrition Screening Tools Are Not Sensitive Enough to Identify Older Hospital Patients with Malnutrition
Source: MDPI journal article supplement (doi:10.3390/nu15245126), 2023-12-17
Supplement: s1 [file s1]

**Supplementary File S1.**

**Table S1.** Concurrent validity of the SNAQ, MUST, MST, MNA-SF and PG-SGA on malnutrition (A) and moderate or risk of malnutrition (B) against the GLIM criteria in patients aged <70 years.

|                   | SNAQ<br>(n=186) |         | MUST<br>(n=186) |         | MST<br>(n=186) | MNA-SF<br>(n=186) |         | PGSGA-SF<br>(n=70) |         |
|-------------------|-----------------|---------|-----------------|---------|----------------|-------------------|---------|--------------------|---------|
|                   | A (≥3)          | B (≥2)  | A (≥2)          | B (≥1)  | A (≥2)         | A (≥3)            | B (≥2)  | A (≥2)             | B (≥9)  |
| False positive, n | 1               | 9       | 3               | 5       | 6              | 3                 | 44      | 16                 | 22      |
| False negative, n | 25              | 16      | 36              | 12      | 24             | 46                | 13      | 8                  | 2       |
| Sensitivity, %    | 66              | 78      | 51              | 84      | 68             | 38                | 82      | 70                 | 93      |
| Specificity, %    | 99              | 92      | 97              | 96      | 95             | 97                | 61      | 63                 | 49      |
| PPV, %            | 98              | 87      | 93              | 93      | 89             | 90                | 58      | 54                 | 53      |
| NPV, %            | 82              | 87      | 85              | 90      | 82             | 70                | 84      | 77                 | 91      |
| Cohen's Kappa     | 0.69            | 0.72    | 0.53            | 0.81    | 0.65           | 0.39              | 0.40    | 0.31               | 0.36    |
| McNemar           | p<0.001         | p=0.230 | p<0.001         | p=0.143 | p=0.003        | p<0.001           | p<0.001 | p=0.152            | p<0.001 |

A: malnutrition (cut-off point); B: moderate or risk of malnutrition (cut-off point); PPV: Positive Predictive Value; NPV: Negative Predictive value; SNAQ: Short Nutritional Assessment Questionnaire; MUST: Malnutrition Universal Screening Tool; MST: Malnutrition Screening Tool; MNA-SF: Mini Nutritional Assessment – Short Form; PG-SGA-SF: Patient Generated – Subjective Global Assessment – Short Form; GLIM: Global Leadership Initiative on Malnutrition

**Table S2.** Concurrent validity of the SNAQ, MUST, MST, MNA-SF and PG-SGA on malnutrition (A) and moderate or risk of malnutrition (B) against the GLIM criteria in patients aged ≥70 years.

|                   | SNAQ<br>(n=170) |         | MUST<br>(n=170) |         | MST<br>(n=170) | MNA-SF<br>(n=170) |         | PGSGA-SF<br>(n=56) |         |
|-------------------|-----------------|---------|-----------------|---------|----------------|-------------------|---------|--------------------|---------|
|                   | A (≥3)          | B (≥2)  | A (≥2)          | B (≥1)  | A (≥2)         | A (≤7)            | B (≤11) | A (≥9)             | B (≥9)  |
| False positive, n | 4               | 8       | 4               | 6       | 10             | 2                 | 35      | 11                 | 16      |
| False negative, n | 40              | 34      | 53              | 20      | 29             | 55                | 8       | 10                 | 4       |
| Sensitivity, %    | 46              | 54      | 27              | 73      | 61             | 26                | 89      | 66                 | 86      |
| Specificity, %    | 96              | 92      | 96              | 94      | 90             | 98                | 64      | 59                 | 41      |
| PPV, %            | 90              | 83      | 83              | 90      | 82             | 91                | 65      | 63                 | 61      |
| NPV, %            | 70              | 72      | 63              | 82      | 75             | 63                | 88      | 62                 | 73      |
| Cohen's Kappa     | 0.44            | 0.48    | 0.25            | 0.68    | 0.52           | 0.26              | 0.51    | 0.25               | 0.27    |
| McNemar           | p<0.001         | p<0.001 | p<0.001         | p=0.009 | p=0.003        | p<0.001           | p<0.001 | p=1.000            | p=0.012 |

A: malnutrition (cut-off point); B: moderate or risk of malnutrition (cut-off point); PPV: Positive Predictive Value; NPV: Negative Predictive value; SNAQ: Short Nutritional Assessment Questionnaire; MUST: Malnutrition Universal Screening Tool; MST: Malnutrition Screening Tool; MNA-SF: Mini Nutritional Assessment – Short Form; PG-SGA-SF: Patient Generated – Subjective Global Assessment – Short Form; GLIM: Global Leadership Initiative on Malnutrition

**Supplementary File S2.** Prevalence of malnutrition and concurrent validity of screening tools against the GLIM criteria based on the Appendicular Skeletal Mass Index (ASMI) (Table 1 and 2) or Skeletal Mass Index (SMI) (Table 3 and 4) threshold for low muscle mass.

**Table S3.** Prevalence of confirmed malnutrition based on the Appendicular Skeletal Mass Index (ASMI) threshold.

|                            | n   | Positive result, n (%) |
|----------------------------|-----|------------------------|
| GLIM                       | 356 | 187 (53)               |
| <i>Phenotypic criteria</i> | 356 | 197 (55)               |
| Weight loss                | 356 | 113 (32)               |
| Low BMI                    | 356 | 59 (17)                |
| Low muscle mass            | 356 | 151 (42)               |
| <i>Etiologic criteria</i>  | 356 | 330 (93)               |
| Reduced intake             | 356 | 251 (71)               |
| Inflammation               | 356 | 294 (83)               |

**Table S4.** Concurrent validity of the SNAQ, MUST, MST, MNA-SF and PG-SGA against the GLIM criteria based on Appendicular Skeletal Mass Index (ASMI) threshold.

|                   | SNAQ<br>(n=356) |         | MUST<br>(n=355) |         | MST<br>(n=356) | MNA-SF<br>(n=356) |         | PGSGA-SF<br>(n=126) |         |
|-------------------|-----------------|---------|-----------------|---------|----------------|-------------------|---------|---------------------|---------|
|                   | A (≥3)          | B (≥2)  | A (≥2)          | B (≥1)  | A (≥2)         | A (≥3)            | B (≥2)  | A (≥2)              | B (≥1)  |
| False positive, n | 3               | 10      | 6               | 10      | 12             | 5                 | 62      | 21                  | 31      |
| False negative, n | 102             | 82      | 127             | 70      | 88             | 140               | 43      | 21                  | 8       |
| Sensitivity, %    | 46              | 56      | 32              | 62      | 53             | 25                | 77      | 68                  | 88      |
| Specificity, %    | 98              | 94      | 96              | 69      | 93             | 97                | 63      | 66                  | 49      |
| PPV, %            | 97              | 91      | 91              | 92      | 89             | 90                | 70      | 68                  | 65      |
| NPV, %            | 62              | 66      | 56              | 69      | 64             | 54                | 71      | 76                  | 79      |
| Cohen's Kappa     | 0.43            | 0.49g   | 0.27            | 0.56    | 0.45           | 0.21              | 0.41    | 0.33                | 0.37    |
| McNemar           | p<0.001         | p<0.001 | p<0.001         | p<0.001 | p<0.001        | p<0.001           | p=0.078 | p=0.233             | p<0.001 |

A: malnutrition (cut-off point); B: risk of/moderate malnutrition (cut-off point); PPV: Positive Predictive Value; NPV: Negative Predictive value; SNAQ: Short Nutritional Assessment Questionnaire; MUST: Malnutrition Universal Screening Tool; MST: Malnutrition Screening Tool; MNA-SF: Mini Nutritional Assessment – Short Form; PG-SGA-SF: Patient Generated – Subjective Global Assessment – Short Form; GLIM: Global Leadership Initiative on Malnutrition

**Table S5.** Prevalence of malnutrition based on the Skeletal Mass Index (SMI) threshold.

|                            | n   | Positive result, n (%) |
|----------------------------|-----|------------------------|
| GLIM                       | 356 | 148 (44)               |
| <i>Phenotypic criteria</i> | 356 | 163 (46)               |
| Weight loss                | 356 | 113 (32)               |
| Low BMI                    | 356 | 59 (17)                |
| Low muscle mass            | 356 | 77 (22)                |
| <i>Etiologic criteria</i>  | 356 | 330 (93)               |
| Reduced intake             | 356 | 251 (71)               |
| Inflammation               | 356 | 294 (83)               |

**Table S6.** Concurrent validity of the SNAQ, MUST, MST, MNA-SF and PG-SGA against the GLIM criteria based on Skeletal Mass Index (SMI) threshold.

|                   | SNAQ<br>(n=356) |        | MUST<br>(n=355) |        | MST<br>(n=356) | MNA-SF<br>(n=356) |        | PGSGA-SF<br>(n=126) |        |
|-------------------|-----------------|--------|-----------------|--------|----------------|-------------------|--------|---------------------|--------|
|                   | A (≥3)          | B (≥2) | A (≥2)          | B (≥1) | A (≥2)         | A (≥3)            | B (≥2) | A (≥2)              | B (≥1) |
| False positive, n | 4               | 15     | 7               | 11     | 17             | 6                 | 75     | 26                  | 37     |
| False negative, n | 72              | 56     | 97              | 40     | 62             | 110               | 25     | 19                  | 7      |
| Sensitivity, %    | 54              | 64     | 37              | 74     | 60             | 30                | 84     | 67                  | 88     |

|                |         |         |         |         |         |         |         |         |         |
|----------------|---------|---------|---------|---------|---------|---------|---------|---------|---------|
| Specificity, % | 98      | 93      | 97      | 95      | 92      | 97      | 63      | 62      | 46      |
| PPV, %         | 96      | 87      | 89      | 91      | 85      | 89      | 64      | 60      | 58      |
| NPV, %         | 73      | 77      | 67      | 83      | 75      | 64      | 83      | 69      | 82      |
| Cohen's Kappa  | 0.55    | 0.58    | 0.36    | 0.70    | 0.54    | 0.29    | 0.45    | 0.29    | 0.32    |
| McNemar        | p<0.001 | p<0.001 | p<0.001 | p<0.001 | p<0.001 | p=1.000 | p<0.001 | p=0.371 | p<0.001 |

A: malnutrition (cut-off point); B: risk of/moderate malnutrition (cut-off point); PPV: Positive Predictive Value; NPV: Negative Predictive value; SNAQ: Short Nutritional Assessment Questionnaire; MUST: Malnutrition Universal Screening Tool; MST: Malnutrition Screening Tool; MNA-SF: Mini Nutritional Assessment – Short Form; PG-SGA-SF: Patient Generated – Subjective Global Assessment – Short Form; GLIM: Global Leadership Initiative on Malnutrition
